# Supplementary material for: High-throughput sequencing of small RNAs revealed the diversified cold-responsive pathways during cold stress in the wild banana (Musa itinerans)
Source: Springer Nature journal article supplement (doi:10.1186/s12870-018-1483-2), 2018-11-29
Supplement: 12870_2018_1483_MOESM9_ESM.pdf [file 12870_2018_1483_MOESM9_ESM.pdf]

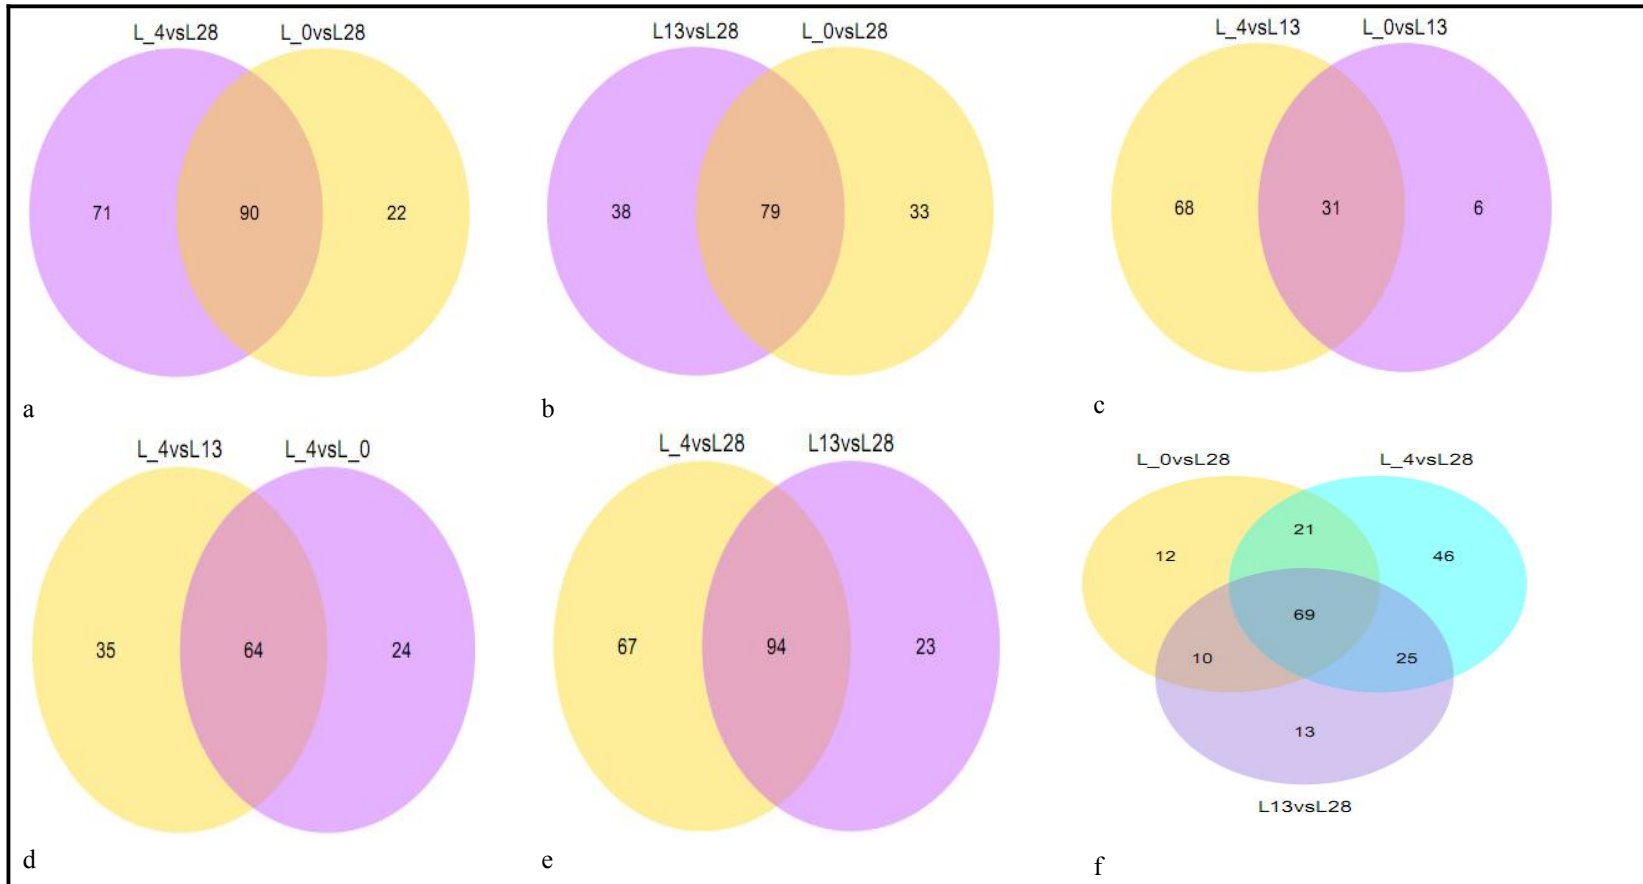

**Additional file 9 Figure S3 Venn diagrams showing the number of DE miRNAs in two or three groups.**
