# Supplementary material for: High-throughput sequencing of small RNAs revealed the diversified cold-responsive pathways during cold stress in the wild banana (Musa itinerans)
Source: Springer Nature journal article supplement (doi:10.1186/s12870-018-1483-2), 2018-11-29
Supplement: 12870_2018_1483_MOESM16_ESM.pdf [file 12870_2018_1483_MOESM16_ESM.pdf]

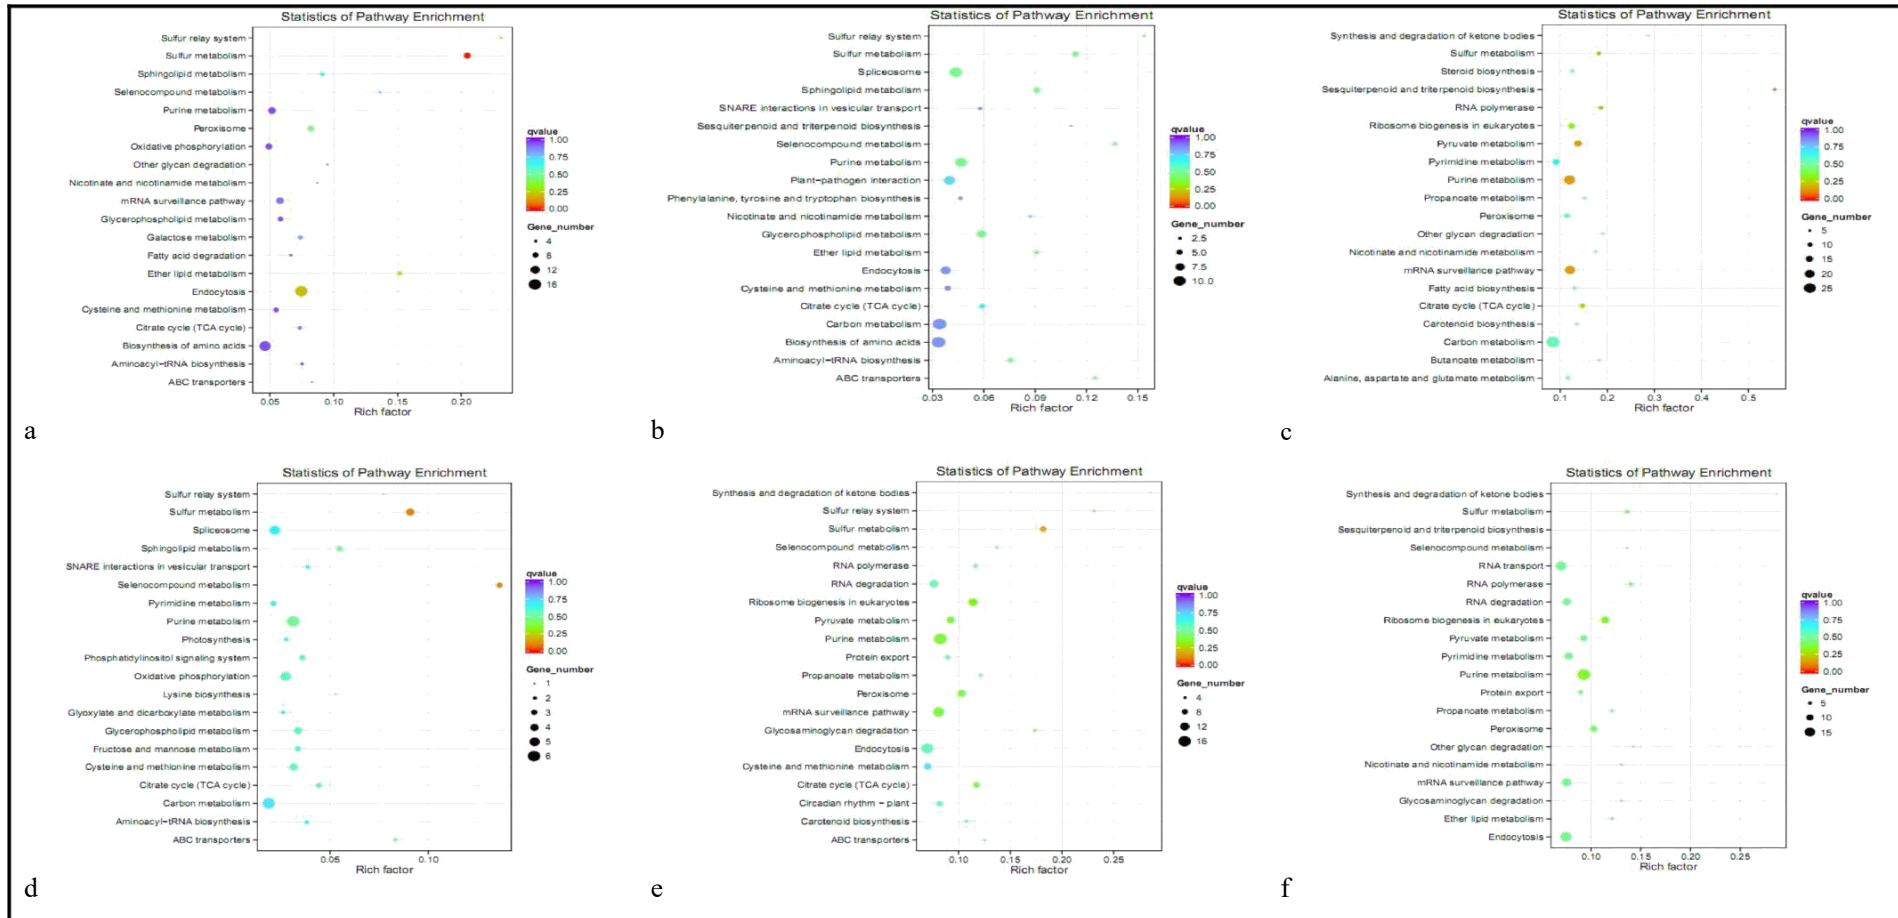

**Additional file 16 Figure S5 The scatter diagrams of top 20 KEGG pathways enriched of target genes for DE miRNAs. A: L4 vs L0; B: L4 vs L13; C: L4 vs L28; D: L0 vs L13; E: L0 vs L28; F: L13 vs L28.**
