# Supplementary material for: High-throughput sequencing of small RNAs revealed the diversified cold-responsive pathways during cold stress in the wild banana (Musa itinerans)
Source: Springer Nature journal article supplement (doi:10.1186/s12870-018-1483-2), 2018-11-29
Supplement: 12870_2018_1483_MOESM18_ESM.pdf [file 12870_2018_1483_MOESM18_ESM.pdf]

### SULFUR METABOLISM

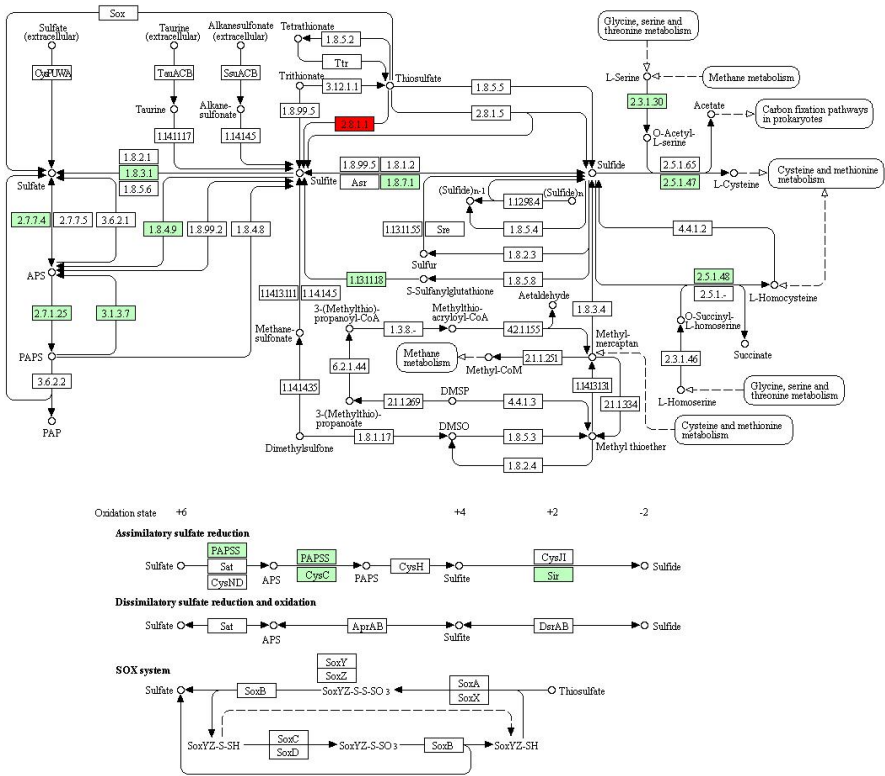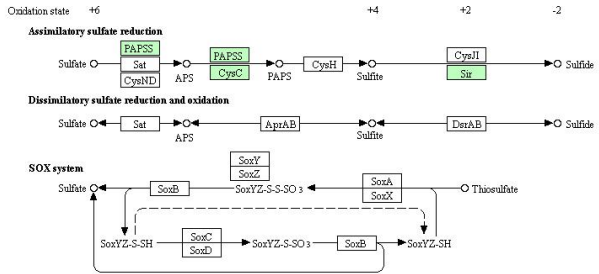

00920 6/25/18  
(c) Kansai Laboratories

a

### SULFUR RELAY SYSTEM

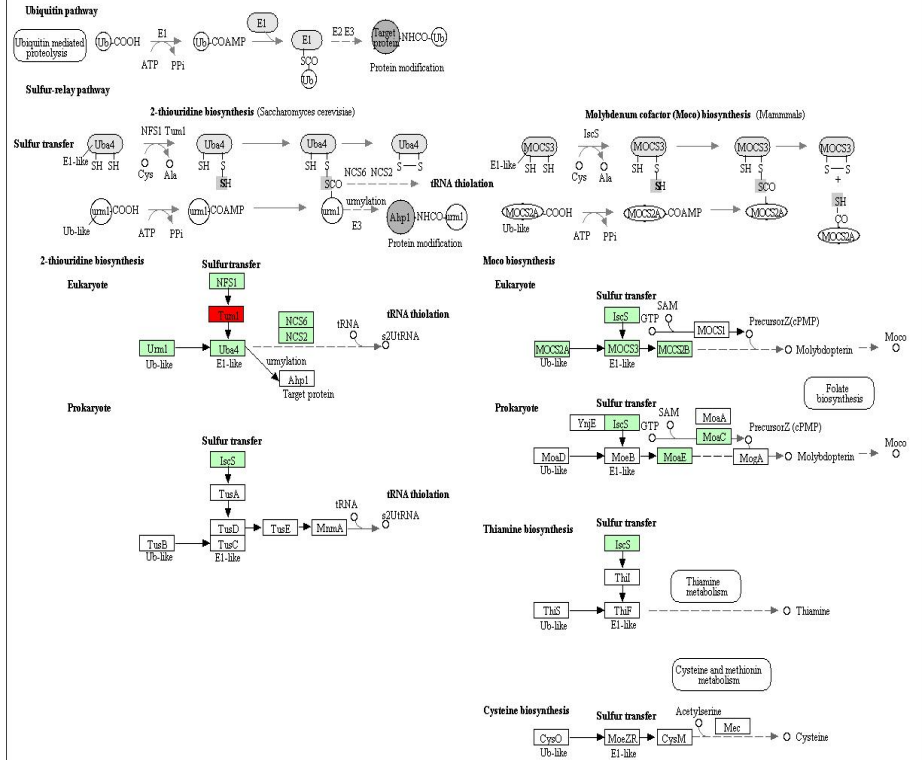

04/22/2017  
(c) Kansai Laboratories

b

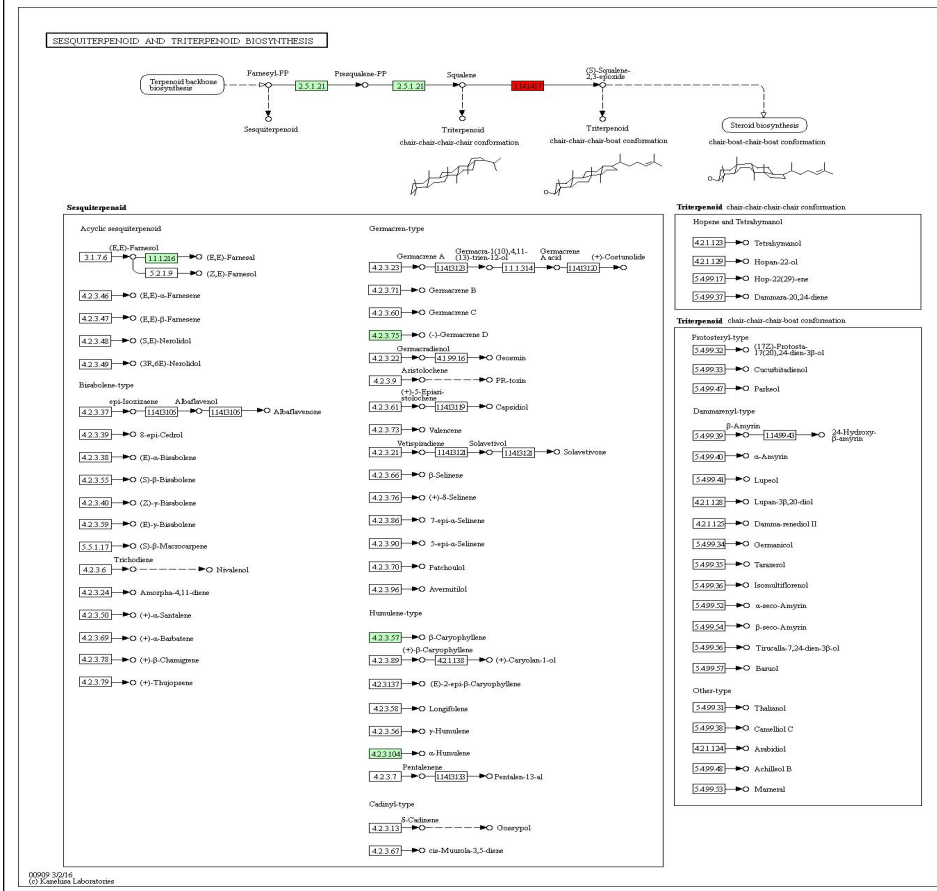

c

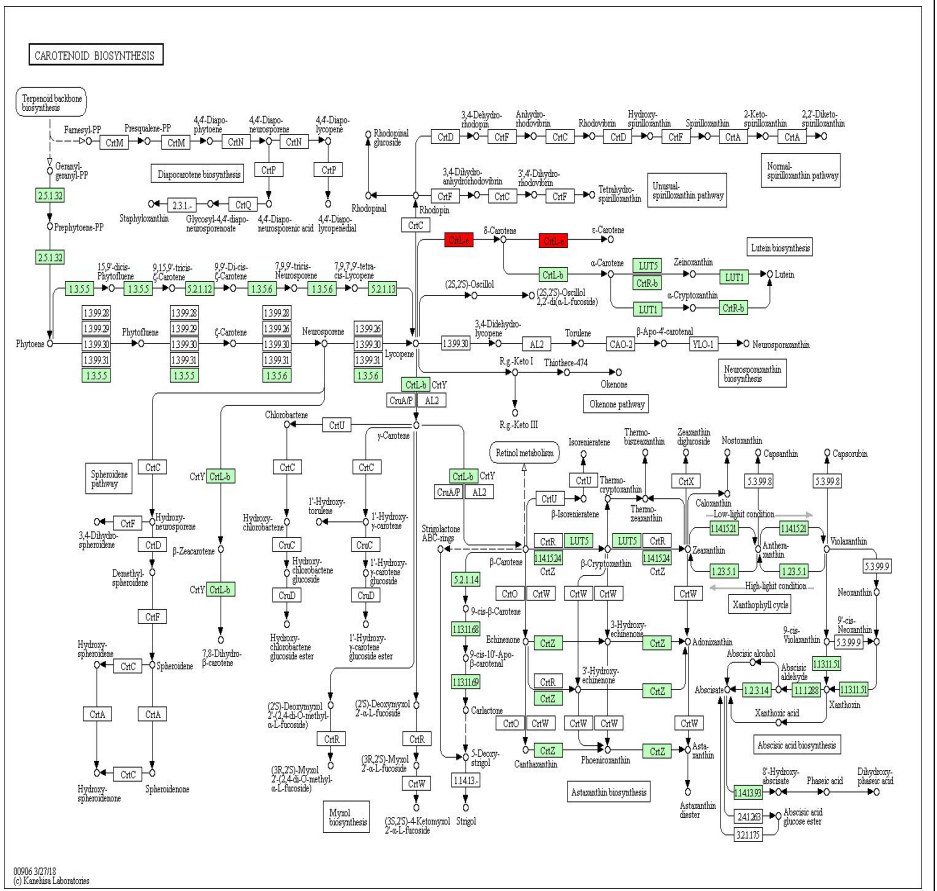

d

FLAVONOID BIOSYNTHESIS

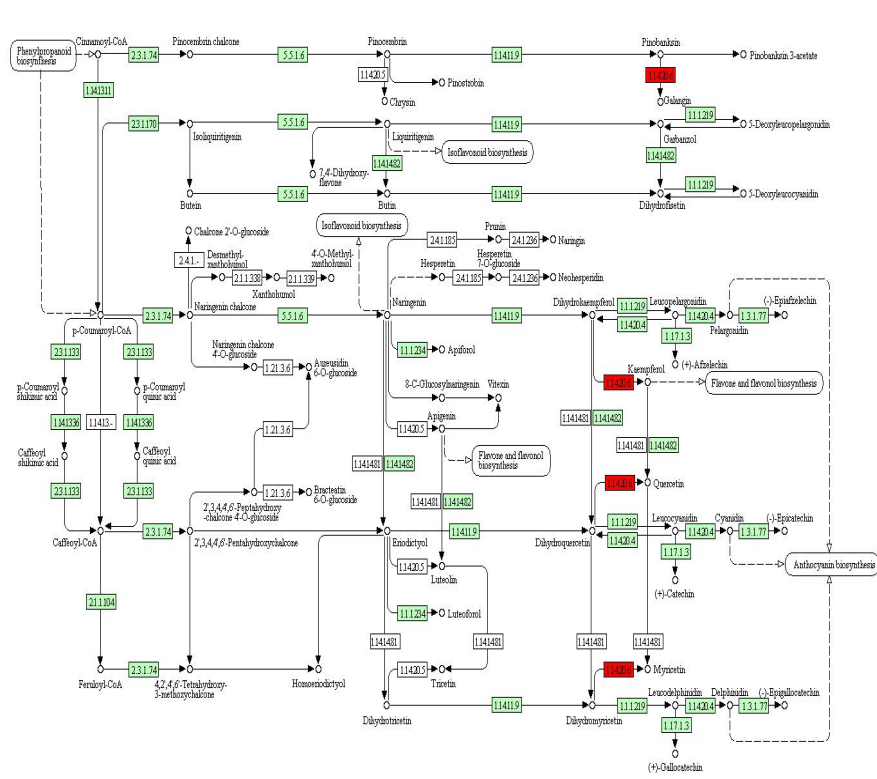

e

FRUCTOSE AND MANNOSE METABOLISM

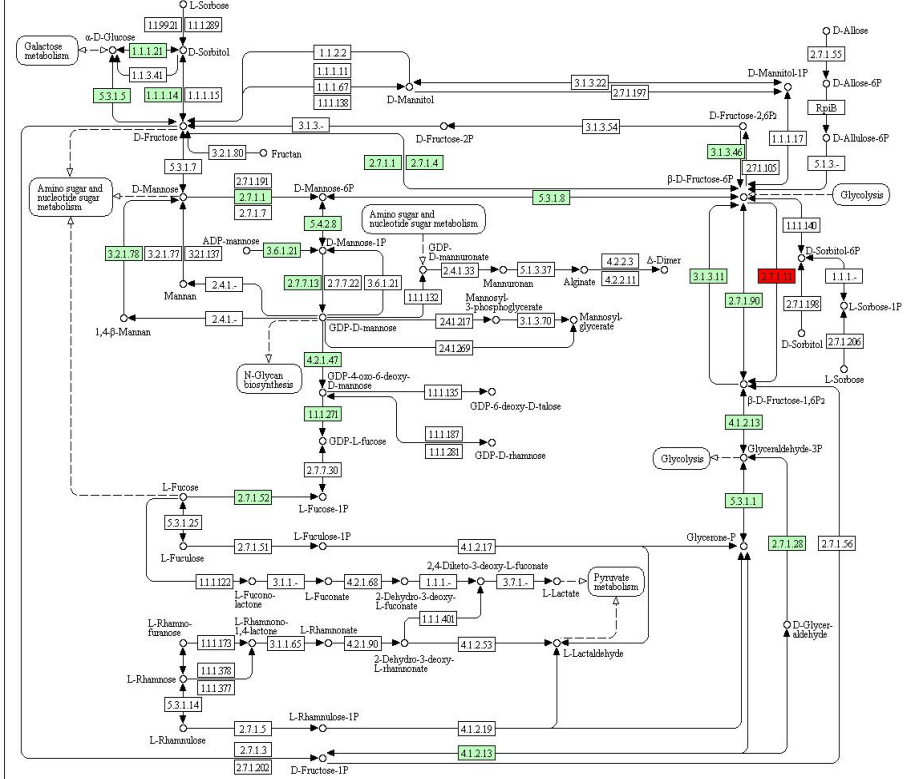

f

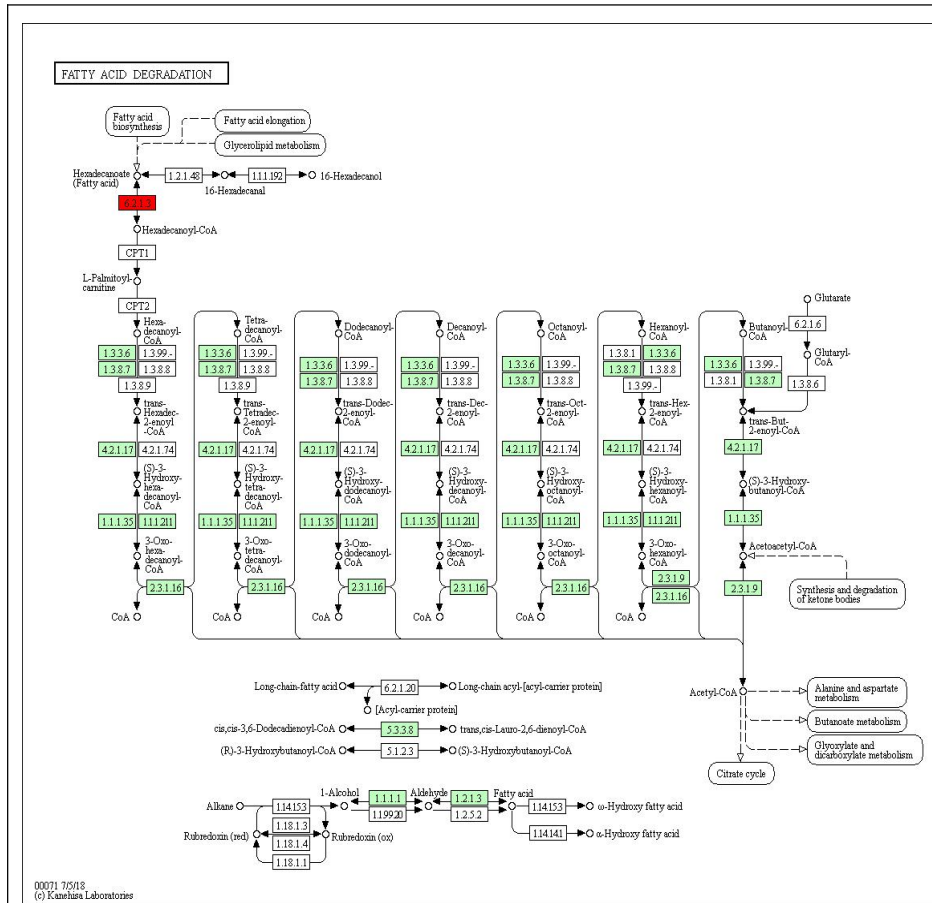

g

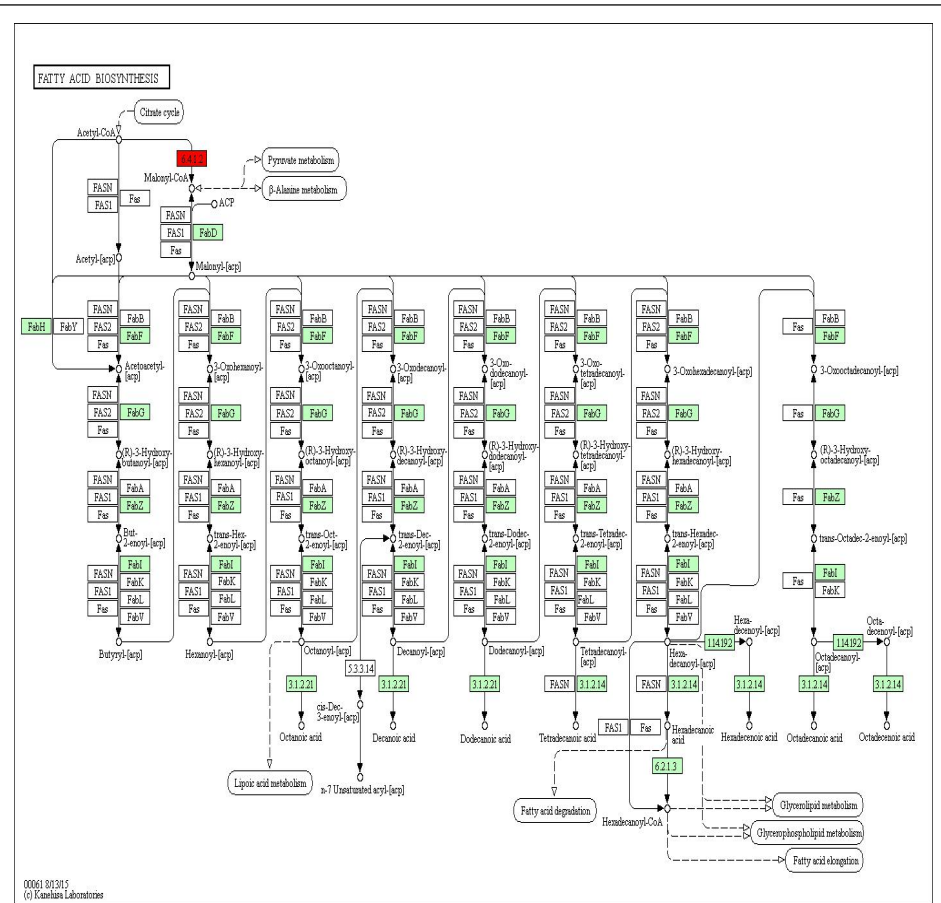

h

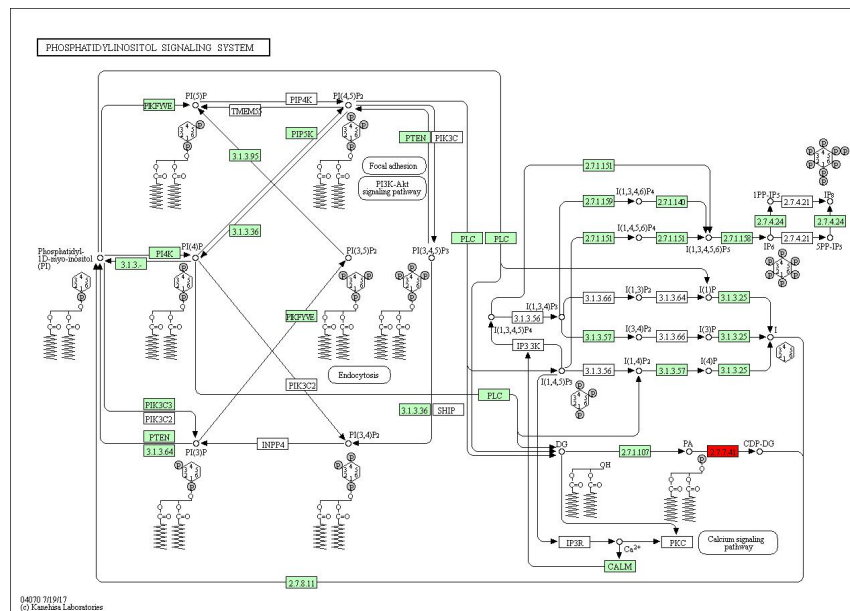

i

**Additional file 18 Figure S6 The targets for DE miRNAs enriched in the top 20 KEGG pathway.** a: sulfur metabolism in L4 vs L0, and the other five groups also in the top 20 pathway; b: sulfur relay system in L4 vs L0, the L4 vs L13, L0 vs L13 and L0 vs L28 also in the top 20 pathway; c: sesquiterpenoid and triterpenoid biosynthesis in L4 vs L28, the L4 vs L13 and L13 vs L28 also in the top 20 pathway; d: carotenoid biosynthesis in L4 vs L28, and the L0 vs L28 also in the top 20 pathway; e: flavonoid biosynthesis in L4 vs L0, and also in the L4 vs L28, L0 vs L13 and L13 vs L28 (not at the top 20 pathway); f: fructose and mannose metabolism in L0 vs L13; g: fatty acid degradation in L4 vs L0; h: fatty acid biosynthesis in L4 vs L28; i: phosphatidylinositol signaling system in L0 vs L13. The nodes are marked in red background color indicating the DEGs is up-regulated expression, and the nodes are marked in green background color indicating the DEGs is down-regulated expression. On the other side, the white nodes indicated the genes are DEGs, but there is no distinguishment of the DEGs about the up- / down-regulated expression.
