# Supplementary material for: High-throughput sequencing of small RNAs revealed the diversified cold-responsive pathways during cold stress in the wild banana (Musa itinerans)
Source: Springer Nature journal article supplement (doi:10.1186/s12870-018-1483-2), 2018-11-29
Supplement: 12870_2018_1483_MOESM19_ESM.pdf [file 12870_2018_1483_MOESM19_ESM.pdf]

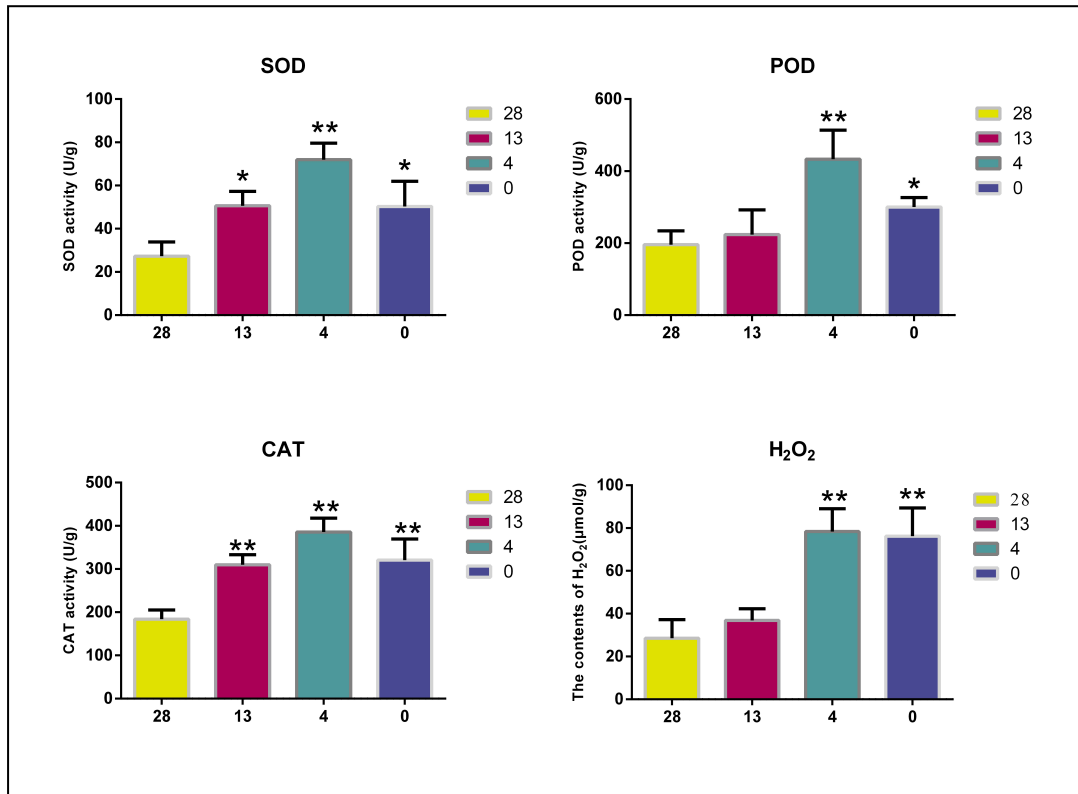

**Additional file 19 Figure S7 The SOD, POD, CAT activities and H<sub>2</sub>O<sub>2</sub> contents in the wild banana during cold stress. \*** showing significant differences ( $p \leq 0.05$ ), **\*\*** showing significant differences ( $p \leq 0.01$ ).
