# Supplementary material for: High-throughput sequencing of small RNAs revealed the diversified cold-responsive pathways during cold stress in the wild banana (Musa itinerans)
Source: Springer Nature journal article supplement (doi:10.1186/s12870-018-1483-2), 2018-11-29
Supplement: 12870_2018_1483_MOESM20_ESM.pdf [file 12870_2018_1483_MOESM20_ESM.pdf]

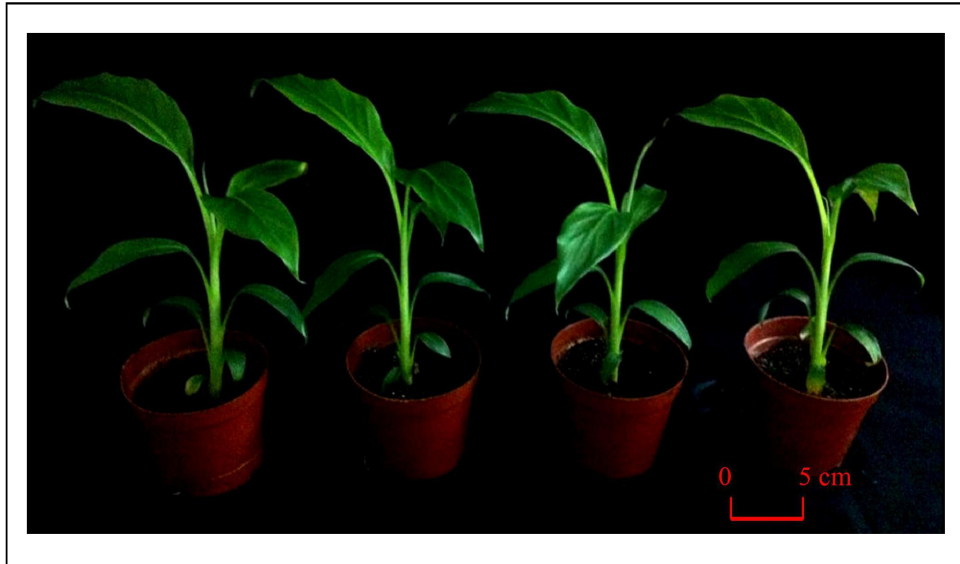

**Additional file 20 Figure S8 The seedlings used from treatments in the wild banana from SanmingCity.**
